# Supplementary material for: Identification and Expression Analysis of the eIF4E1 Gene Family in Maize
Source: Research Square preprint supplement (doi:10.21203/rs.3.rs-7863718/v1), 2025-11-20
Supplement: Supplementary file 1 [file 0beb2563eb0a8af2fc67d178.xlsx]

## Sheet: Sheet1
The primer sequences of QPCR
ID	Primer(5'→3')
Actin-F	GATTCCTGGGATTGCCGAT
Actin-R	TCTGCTGCTGAAAAGTGCTGAG
Zm00001eb011490_T001-F	TTTGGTACCTCCTTCTTTACTGCCCGAGA
Zm00001eb011490_T001-R	TTTTCTAGATCCTCTCAGCCATGTGTTC
Zm00001eb046430_T002-F	AAAGGATCCGCCTGGGACTGCTGATTTTC
Zm00001eb046430_T002-R	TTTGGATCCCTCCAGAACGCAATGACTCG
Zm00001eb046430_T001-F	AAAGGATCCCTGCCCCAACTCAGAAAAAC
Zm00001eb046430_T001-R	TTTGGATCCCACGGTGTACCGTCCACCT
Zm00001eb137550_T001-F	AAAGGTACCAAAGCCTCTCTCACCACAGC
Zm00001eb137550_T001-R	TTTGGATCCAACCGTGTAACGGTTCTTCA
Zm00001eb139930_T001-F	AAAGGTACCCAAACCTCCTTGGACACGAC
Zm00001eb139930_T001-R	TTTGGATCCCTTAGAAAGAGATGCGACT
Zm00001eb222060_T001-F	AAAGGTACCAAAAGACCCCTCGAAAAACG
Zm00001eb222060_T001-R	TTTGGATCCCACGGTGTACCGCCCACCT
