# Supplementary material for: Identification and Expression Analysis of the eIF4E1 Gene Family in Maize
Source: Research Square preprint supplement (doi:10.21203/rs.3.rs-7863718/v1), 2025-11-20
Supplement: Supplementary file 1 [file e2f86b12c69194ba2a6ee197.pdf]

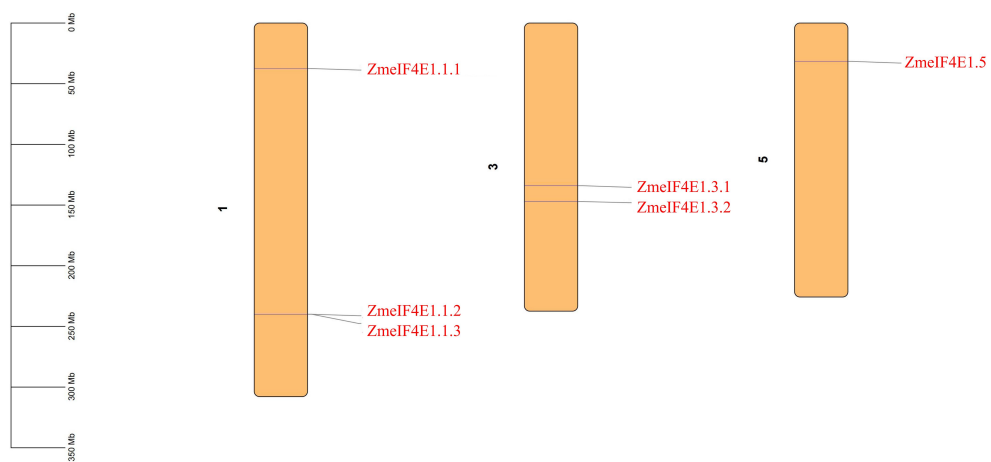

Figure S1 The chromosomal location of the ZmeIF4E1 gene family.

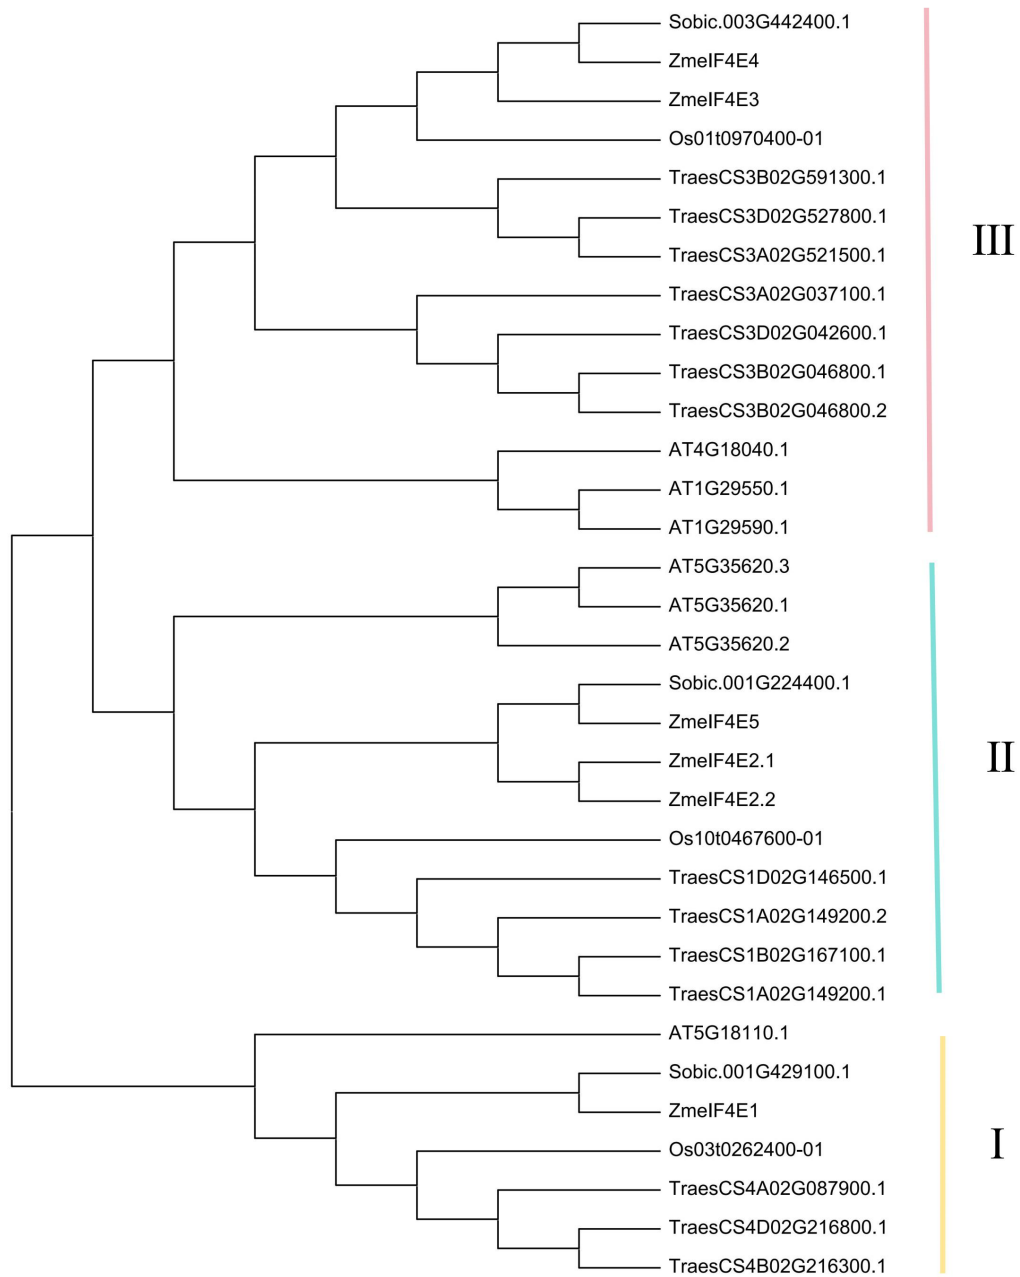

Figure S2 Phylogenetic analysis of the ZmeIF4E1 protein. A neighbor-joining phylogenetic tree was constructed using MEGA 11.0 software with 1000 bootstrap replicates.

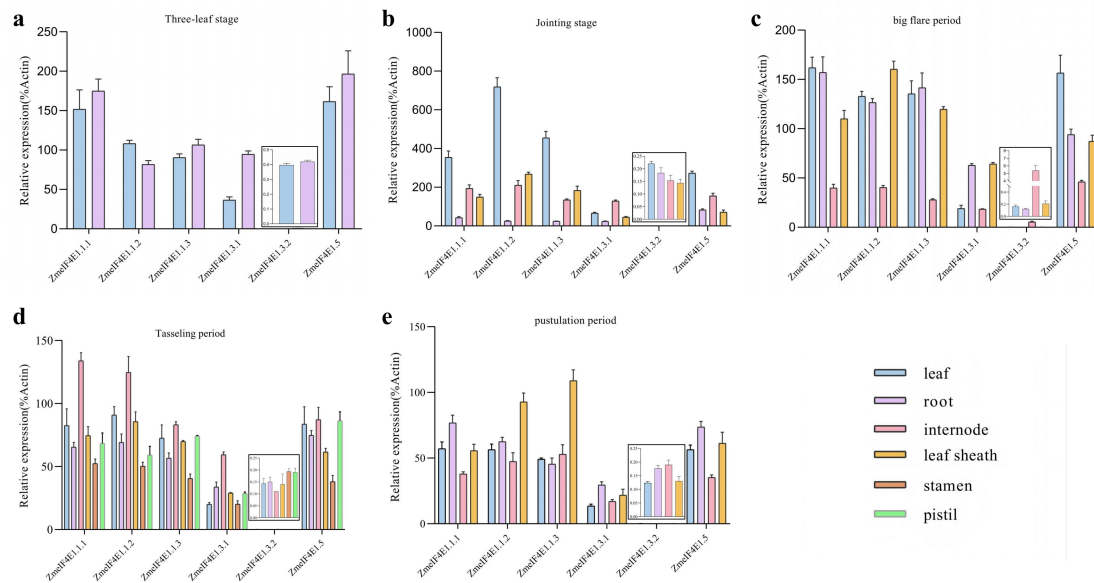

Figure S3 Relative expression levels of the ZmIF4E1 gene at different developmental stages of maize. The expression levels of the ZmIF4E1 gene in six maize tissue expression types were studied using qRT-PCR with triplicate replicates. Error bars indicate standard error (SE) .

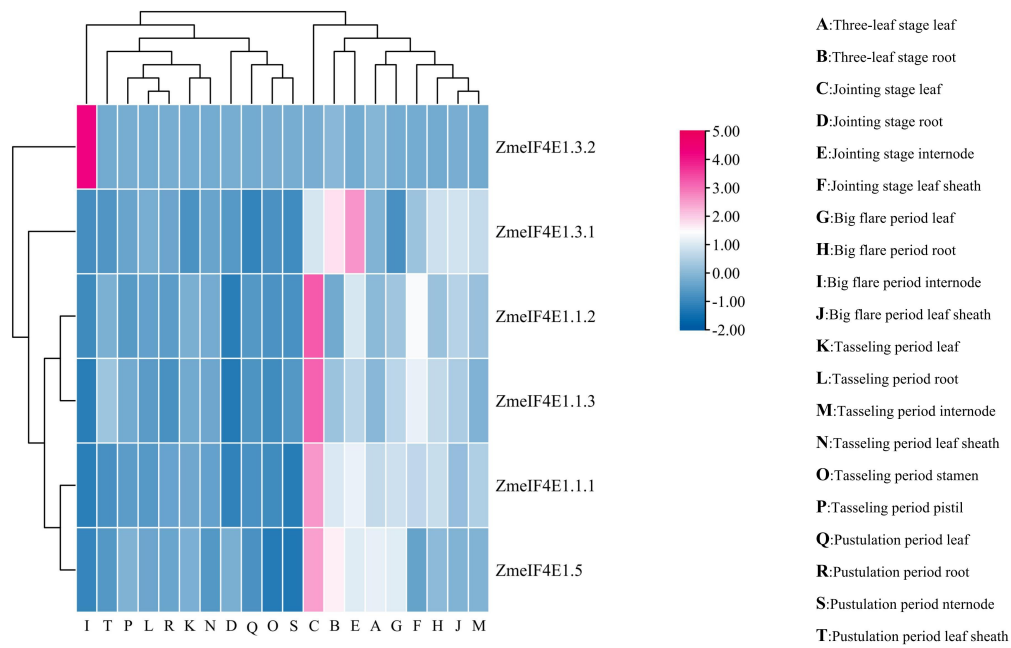

Figure S4 Heatmap summarizing the expression levels of 6 ZmeIF4E1 genes in different tissues of corn at various developmental stages
