# Supplementary material for: Identification and Expression Analysis of the eIF4E1 Gene Family in Maize
Source: Research Square preprint supplement (doi:10.21203/rs.3.rs-7863718/v1), 2025-11-20
Supplement: Supplementary file 2 [file 33ce80da881a44f6d484eeee.xlsx]

## Sheet: Sheet1
Distribution of cis-acting elements in the meIF4E1 gene promoter
ID	Site	Signal
Zm00001eb011490_T001	G-box	cis-acting regulatory element involved in light responsiveness
Zm00001eb011490_T001	ARE	cis-acting regulatory element essential for the anaerobic induction
Zm00001eb011490_T001	GC-motif	enhancer-like element involved in anoxic specific inducibility
Zm00001eb011490_T001	GC-motif	enhancer-like element involved in anoxic specific inducibility
Zm00001eb011490_T001	GC-motif	enhancer-like element involved in anoxic specific inducibility
Zm00001eb011490_T001	I-box	part of a light responsive element
Zm00001eb011490_T001	Unnamed__2
Zm00001eb011490_T001	Unnamed__1
Zm00001eb011490_T001	Unnamed__1
Zm00001eb011490_T001	Unnamed__1
Zm00001eb046430_T001	Unnamed__1
Zm00001eb046430_T001	Unnamed__1
Zm00001eb046430_T001	Unnamed__1
Zm00001eb046430_T001	dOCT
Zm00001eb046430_T001	ABRE4
Zm00001eb046430_T001	ABRE4
Zm00001eb046430_T001	DRE1
Zm00001eb046430_T001	ABRE3a
Zm00001eb046430_T001	ABRE3a
Zm00001eb046430_T001	ARE	cis-acting regulatory element essential for the anaerobic induction
Zm00001eb046430_T001	ARE	cis-acting regulatory element essential for the anaerobic induction
Zm00001eb046430_T001	GC-motif	enhancer-like element involved in anoxic specific inducibility
Zm00001eb046430_T001	G-box	cis-acting regulatory element involved in light responsiveness
Zm00001eb046430_T001	G-box	cis-acting regulatory element involved in light responsiveness
Zm00001eb046430_T001	G-box	cis-acting regulatory element involved in light responsiveness
Zm00001eb046430_T001	G-box	cis-acting regulatory element involved in light responsiveness
Zm00001eb046430_T002	DRE1
Zm00001eb046430_T002	ABRE4
Zm00001eb046430_T002	ABRE4
Zm00001eb046430_T002	dOCT
Zm00001eb046430_T002	ABRE3a
Zm00001eb046430_T002	ABRE3a
Zm00001eb046430_T002	Unnamed__1
Zm00001eb046430_T002	Unnamed__1
Zm00001eb046430_T002	Unnamed__1
Zm00001eb046430_T002	G-box	cis-acting regulatory element involved in light responsiveness
Zm00001eb046430_T002	G-box	cis-acting regulatory element involved in light responsiveness
Zm00001eb046430_T002	G-box	cis-acting regulatory element involved in light responsiveness
Zm00001eb046430_T002	G-box	cis-acting regulatory element involved in light responsiveness
Zm00001eb046430_T002	GC-motif	enhancer-like element involved in anoxic specific inducibility
Zm00001eb046430_T002	ARE	cis-acting regulatory element essential for the anaerobic induction
Zm00001eb046430_T002	ARE	cis-acting regulatory element essential for the anaerobic induction
Zm00001eb137550_T001	ARE	cis-acting regulatory element essential for the anaerobic induction
Zm00001eb137550_T001	O2-site	cis-acting regulatory element involved in zein metabolism regulation
Zm00001eb137550_T001	Unnamed__1
Zm00001eb139930_T001	Unnamed__2
Zm00001eb139930_T001	Unnamed__2
Zm00001eb139930_T001	Unnamed__2
Zm00001eb139930_T001	Unnamed__2
Zm00001eb139930_T001	Unnamed__1
Zm00001eb139930_T001	Unnamed__1
Zm00001eb139930_T001	Unnamed__1
Zm00001eb139930_T001	ABRE3a
Zm00001eb139930_T001	ABRE4
Zm00001eb139930_T001	DRE1
Zm00001eb139930_T001	G-box	cis-acting regulatory element involved in light responsiveness
Zm00001eb139930_T001	G-box	cis-acting regulatory element involved in light responsiveness
Zm00001eb139930_T001	G-box	cis-acting regulatory element involved in light responsiveness
Zm00001eb139930_T001	O2-site	cis-acting regulatory element involved in zein metabolism regulation
Zm00001eb139930_T001	GC-motif	enhancer-like element involved in anoxic specific inducibility
Zm00001eb139930_T001	GC-motif	enhancer-like element involved in anoxic specific inducibility
Zm00001eb139930_T001	GC-motif	enhancer-like element involved in anoxic specific inducibility
Zm00001eb139930_T001	ARE	cis-acting regulatory element essential for the anaerobic induction
Zm00001eb139930_T001	ARE	cis-acting regulatory element essential for the anaerobic induction
Zm00001eb139930_T001	ARE	cis-acting regulatory element essential for the anaerobic induction
Zm00001eb222060_T001	ABRE4
Zm00001eb222060_T001	ABRE4
Zm00001eb222060_T001	ABRE4
Zm00001eb222060_T001	ABRE3a
Zm00001eb222060_T001	ABRE3a
Zm00001eb222060_T001	ABRE3a
