# Supplementary material for: Identification and Expression Analysis of the eIF4E1 Gene Family in Maize
Source: Research Square preprint supplement (doi:10.21203/rs.3.rs-7863718/v1), 2025-11-20
Supplement: Supplementary file 3 [file 37d304fa9b4ef0dc08103fbd.xlsx]

## Sheet: Sheet1
The protein sequences of each species in the phylogenetic evolutionary tree
ID	Species	Protein sequence
Zm00001eb011490_P001	Maize	MEAAAENKEAEQEQQQLPHARKDNAPAAAEEDEADSEETERRNRDLKSGLHPLRHKLVLWYTRRTPGARSQSYEDNIKKIIDFSTVESFWVCYCHLARPSSLPSPTDLHLFKDGIRPLWEDPANQNG GKWIIRFKKAVSGRFWEDLVLVVVGDQLEYSDDVCGVVLSVRFNEDILSVWNRNASDHQAVMALRDSIKRHLKLPHSYLMEYKPHDASRRDNSSYRNTWLRG
Zm00001eb046430_P001	Maize	MAEVEAPAAAVAAATPEVATVTEGGAATEAKGPHKLHRQWTFWYDIQSKPKPGAAWGTSLKKAYTFDTVEEFWGLYDHVFRPSKLPGTADFHLFKAGVEPKWEDPECANGGKWTVPCNRKPTFE TMWLETLMALVGEQFDETDDICGIVASVRPRGDKLALWTRTASNEAVQVNIGKKWKDVIDYNDKIIYTFHDDSRRDKPSRGGRYTV
Zm00001eb046430_P002	Maize	MAEVEAPAAAVAAATPEVATVTEGGAATEAKGPHKLHRQWTFCLYDHVFRPSKLPGTADFHLFKAGVEPKWEDPECANGGKWTVPCNRKPTFETMWLETLMALVGEQFDETDDICGIVASVRPR GDKLALWTRTASNEAVQVNIGKKWKDVIDYNDKIIYTFHDDSRRDKPSRGGRYTV
Zm00001eb137550_P001	Maize	MAEETDTRPASAGSRGRPAPEDDDREEGEITDLACAPSPPATHPLEHSWTFWFDNPQSKSKQAAWGSSIRPIHTFSTVEEFWGLYNNINHPSKLIVGADFHCFKNKIEPKWEDPICANGGKWTISCGRGK SDTFWLHTLLAMIGEQFDYGDEICGAVVSVRGKQERIAIWTKNAANEAAQVSIGKQWKELLDYKDSIGFIVHDDAKKMDKGLKNRYTV
Zm00001eb139930_P001	Maize	MADEIDTRPASAGSRGRPAHATEDDDREEGEIAADAPSPALPAAHPLEHSWTFWFDNPHGKNKMAAWGSSIRPIHTFSTVEDFWGLYNNIHHPSKLIGGADFHCFKNKIEPKWEDPICANGGKWTISCG RGKSDTLWLHTLLAMIGEQFDYGDEICGAVVSVRSKQERIAIWTKNAANEAAQISIGKQWKEFLDYKDSIGFIVHDDAKKMDKGLKNRYTV
Zm00001eb222060_P001	Maize	MAEVEAPATAVEAPAAAVATTTPEVAAPEAGAATEAKGPHKLHRQWTFWYDIQTKTKSGAAWGTSLKKAYTFDTVEEFWSMYDQIFRPSKLSGNADFHLFKAGVEPKWEDPECANGGKWTVPCN RKATFETMWLETLMALIGEQFDETEDICGIVASVRARGDKLALWTRTASNEAVQVNIGKKWKDVIDYNDKITYTFHDDSKRDKPSRGGRYTV
Sobic.001G224400.1	sorghum	MAEVEVPAAAVATTIPEAAEATEGGAAAEAKGPHKLHRQWTFWYDIQSKPKPGAAWGTSLKKAYTFDTVEEFWSLYDQIFRPSKLSGNADFHLFKAGVEPKWEDPECANGGKWTVPCNRKATFENMWLE TLMALIGEQFDETEDICGIVASVRARGDKLALWTRTASNEAVQVNIGKKWKDVIDYNDKITYTFHDDSRREKPSRGGRYTV
Sobic.001G429100.1	sorghum	MEAAVEKKEAEQEEQQLPHARKDDAPAAAEEDEADAEETERRNRDLKAGLHPLRRKLVLWYTRRTPGARSQAYEDNIKKIIDFSTVESFWVCYCHLARPSSLPSPTDLHLFKDGIRPLWEDPANQNGGKWIIRF KKAVSGRFWEDLVLVLVGDQLEYSDDVCGVVLSVRFNEDILSVWNRNASDHQAVMALRDSIKRHLKLPHSYLMEYKPHDASRRDNSSYRNTWLRG
Sobic.003G442400.1	sorghum	MADEIDTRPASAGSRGRPAHATEDDDREEGEIADDTPAPALPVTHPLEHSWTFWFDNPQGKNKQAAWGSSIRPIHTFSTVEDFWGLYNNIHHPSKLVIGADFHCFKNKIE PKWEDPICANGGKWTISCGRGKSDTLWLHTLLAMIGEQFDYGDEICGAVVSVRGKQERIAIWTKNAANEAAQISIGKQWKEFLDYKDSIGFIVHDDAKKADKGPRNRYTV
AT1G29550.1	Arabidopsis thaliana	MVVTDSPVSGIMADQNIDPNTTTSPSPKEKHVSAIKAISGDEKAPSKEKKNYASKKSTTVIQKSHCFQNSWTFWFDNPSSKSNQVIWGSSLRSLYTFGTIEEFWSLYNNIHPPTKWVSGADLYCFKDKI EPKWEDPICANGGKWSMMFPKATLECNWLNTLLALVGEQFDQGDEICGAVLNFRARGDRISLWTKNAANEEAQLSIGKQWKELLGYNETIGFIVHEDAKTLDRDAKRRYTV
AT1G29590.1	Arabidopsis thaliana	MVVMDSPVSGRMADQNIDPNTTTSPSPIEKHVSAIKAISGDEKAPSKEKKNYASKKSTTVIQKSHCFQNSWTFWFDNPSSKSNQVIWGSSLRSLYTFATIEEFWSLYNNIHPPTKWVSGSDLYCFKDKIEPKWEDPICANGGKWTMFFPRATLESNWLNTLLALVGEQFDQGDEICGAVLNFRTRGDRISLWTKKAANEEAQLSIGKQWKELLGYNDTIGFIVHEDAKTLDRDAKRRYTV
AT4G18040.1	Arabidopsis thaliana	MAVEDTPKSVVTEEAKPNSIENPIDRYHEEGDDAEEGEIAGGEGDGNVDESSKSGVPESHPLEHSWTFWFDNPAVKSKQTSWGSSLRPVFTFSTVEEFWSLYNNMKHPSKLAHGADFYCFKHIIEPKWE DPICANGGKWTMTFPKEKSDKSWLYTLLALIGEQFDHGDEICGAVVNIRGKQERISIWTKNASNEAAQVSIGKQWKEFLDYNNSIGFIIHEDAKKLDRNAKNAYTA
AT5G18110.1	Arabidopsis thaliana	MEVLDRRDDEIRDSGNMDSIKSHYVTDSVSEERRSRELKDGDHPLRYKFSIWYTRRTPGVRNQSYEDNIKKMVEFSTVEGFWACYCHLARSSLLPSPTDLHFFKDGIRPLWEDGANCNGGKWIIRFSKV VSARFWEDLLLALVGDQLDDADNICGAVLSVRFNEDIISVWNRNASDHQAVMGLRDSIKRHLKLPHAYVMEYKPHDASLRDNSSYRNTWLRG
AT5G35620.1	Arabidopsis thaliana	MATDDVNEPLPAAAELPATEAEKQPHKLERKWSFWFDNQSKKGAAWGASLRKAYTFDTVEDFWGLHETIFQTSKLTANAEIHLFKAGVEPKWEDPECANGGKWTWVVTANRKEALDKGWLETLM ALIGEQFDEADEICGVVASVRPQSKQDKLSLWTRTKSNEAVLMGIGKKWKEILDVTDKITFNNHDDSRRSRFTV
AT5G35620.2	Arabidopsis thaliana	MATDDVNEPLPAAAELPATEAEKQPHKLERKWSFWFDNQSKKGAAWGASLRKAYTFDTVEDFWGLHETIFQTSKLTANAEIHLFKAGVEPKWEDPECANGGKWTWVVTANRKEALDKGWLETLM ALIGEQFDEADEICGVVASVRPQSKQDKLSLWTRTKSNEAVLV
AT5G35620.3	Arabidopsis thaliana	MATDDVNEPLPAAAELPATEAEKQPHKLERKWSFWFDNQSKKGAAWGASLRKAYTFDTVEDFWGLHETIFQTSKLTANAEIHLFKAGVEPKWEDPECANGGKWTWVVTANRKEALDKGWLETLM ALIGEQFDEADEICGVVASVRPQSKQDKLSLWTRTKSNEAVLMGIGKKWKEILDVTDKITFNNHDDSRRSRFTV
Os01t0970400-01	Rice	MAEEHETRPPSAGRPPSSGRGRADDADEREEGEIADDDSGHAPPQANPAAPHPLEHAWTFWFDNPQGKSKQATWGSSIRPIHTFSTVEDFWSLYNNIHHPSKLVVGADFHCFKNKIEPKWEDPICANG GKWTFSCGRGKSDTMWLHTLLAMIGEQFDYGDEICGAVVSVRGKQERIAIWTKNAANEAAQISIGKQWKEFLDYKDSIGFIVHDDAKKMDKGLKNRYTV
Os03t0262400-01	Rice	MEPAAEKREAEQEELQQQHDEPAVPSADDDEAEAEENERRNRELKAGFHPLRRRFVLWYTRRTPGARSQSYEDNIKKIVDFSTVESFWVCYCHLTRPVSLPSPTDLHLFKEGIRPLWEDPANRSGGKW IIRFKKTVSGRFWEDLVLVLVGDQLDYSDDVCGVVLSVRFNEDILSVWNRNASDHQAVMTLRDSIKRHLKLPHSYLMEYKPHDASLRDNSSYRNTWLRG
Os10t0467600-01	Rice	MAEVEAAPIAAAETPEVAAAEGAAAAKAPHKLHRQWAFWYDIQSKPKPGAAWGTSLRKAYTFDTVEEFWGLYDQIFRPSKVTVNADFHLFKAGVEPKWEDPECANGGKWTVPCSRKTTLENMWL ETLMALIGEQFDESEEICGVVASVRQRGDKLALWTRTASNEAVQVNIGKKWKEIVDYNDKMVYSFHDDAKREKPSRGGRYNV
TraesCS1A02G149200.1	Wheat	MAEVEAALPVAATETPEVAAESDAGAAEAKGPHKLQRQWTFWYDIQTKPKPGAAWGTSLKKGYTFDTVEEFWCFFGSLYDQIFRPSKLVGSADFHLFKAGVEPKWEDPECANGGKWTVISSRKANL DTMWLETCMALIGEQFDESQEICGVVASVRQRQDKLSLWTKTASNEAVQVDIGKKWKEVIDYNDKMVYSFHDDSRSQKPSRGGRYTV
TraesCS1A02G149200.2	Wheat	MAEVEAALPVAATETPEVAAESDAGAAEAKGPHKLQRQWTFWYDIQTKPKPGAAWGTSLKKGYTFDTVEEFWCLYDQIFRPSKLVGSADFHLFKAGVEPKWEDPECANGGKWTVISSRKANLDTM WLETCMALIGEQFDESQEICGVVASVRQRQDKLSLWTKTASNEAVQVDIGKKWKEVIDYNDKMVYSFHDDSRSQKPSRGGRYTV
TraesCS1B02G167100.1	Wheat	MAEVEAALPVAATETPEVAAEGDAGAAEAKGPHKLQRQWTFWYDIQTKPKPGAAWGTSLKKGYTFDTVEEFWCLYDQIFRPSKLVGSADFHLFKAGVEPKWEDPECANGGKWTVISSRKANLDTM WLETCMALIGEQFDESQEICGVVASVRQRQDKLSLWTKTASNEAVQVDIGKKWKEVIDYNDKMVYSFHDDSRSQKPSRGGRYTV
TraesCS1D02G146500.1	Wheat	MAEVEAALPVAATETPEVAAEGDAGAAEAKGPHKLQRQWTFWYDIQTKPKPGAAWGTSLKKGYTFDTVEEFWCLYDQIFRPSKLVGSADFHLFKAGVEPKWEDPECANGGKWTVISSRKTNLDTM WLETCMALIGEQFDESQEICGVVASVRQRQDKLSLWTKTASNEAVQVDIGKKWKEVIDYNDKMVYSFHDDSRSQKPSRGGRYTV
TraesCS3A02G037100.1	Wheat	MAEGTDTVRAPGDAEEMEKGEIAGAAAGADGDSAAPQPVEPTWAFWIGNGNPQEDSAGRGNTVHTFSTVDDFLSLYNNILHPSKLGVGADLHCFKNKIEPKCEGPICANGGAWTISCGEGKSQPLWLDTLLALIGGQFEYGNEICGAVLSVCGKQETIAIWIKDATNEAAQLSIGKQWKEFLEYKDSVEFIVHDSDATAVQCWSSTFPDDPLDVIYNKVPSHCSRVRFAAVCRSWCTAASRHPALPELPWLLLSPRDRDTTKRLYCPEDSKILCISLPSDFIGNWFVGCHGGGWVASFEPPPFRILNIFSSVEVALSEKQKGIVCPGRLGQIIIWKIIFSKPPTSSDCIIAAITDNHGIALCRVGCPNGGWTTKGHVSYTMELADIAFCNGKLYGLTRD…
TraesCS3A02G521500.1	Wheat	MAEDTETRPASAGAEEREEGEIADDGDGSSAAAAGRITAHPLENAWTFWFDNPQGKSRQVAWGSTIHPIHTFSTVEDFWGLYNNIHNPSKLNVGADFHCFKNKIEPKWEDPICANGGKWTISCGRGKS DTFWLHTLLAMIGEQFDFGDEICGAVVSVRQKQERVAIWTKNAANEAAQISIGKQWKEFLDYKDSIGFIVHEDAKRSDKGPKNRYTV
TraesCS3B02G046800.1	Wheat	MAEGADTVRAPADAEEIEKGEIAGAAAGADGDSAAPQPVEPTWAFWIRNPQEESAGRENTVHTFSTVDDFRSLYKNILHPSKLGVGADLHCFKNKIEPKCEGPIRGNGGAWTISCGEGKSQPLWLDTIL ALIGEQFEYDNEICGAILSVRAKQETIAIWIKDATNEAAQLSIGKQWKEILEYKDSIEFIVHDSDATAVQCWSSTFPDDPLDVIYNKVPSHCSRVRFAAVCRSWCTAASRHPALPELPWLLLSPRDRDTTKRLYCPEDSKNLRISLPSDFIGNWFVGCHGGGWVASFEPPPFRILNIFSSVEVALSEKQKGIVCPGRLGQIIIWKIIFSKPPTSSDCIIAAITDNHGIALCRVGSPNGGWTTKGDVSYTMELADIAFCNGELYGLTRDR…
TraesCS3B02G046800.2	Wheat	MAEGADTVRAPADAEEIEKGEIAGAAAGADGDSAAPQPVEPTWAFWIRNPQEESAGRENTVHTFSTVDDFRRVKNSASENRLYKNILHPSKLGVGADLHCFKNKIEPKCEGPIRGNGGAWTISCGEGK SQPLWLDTILALIGEQFEYDNEICGAILSVRAKQETIAIWIKDATNEAAQLSIGKQWKEILEYKDSIEFIVHDSDATAVQCWSSTFPDDPLDVIYNKVPSHCSRVRFAAVCRSWCTAASRHPALPELPWL LLSPRDRDTTKRLYCPEDSKNLRISLPSDFIGNWFVGCHGGGWVASFEPPPFRILNIFSSVEVALSEKQKGIVCPGRLGQIIIWKIIFSKPPTSSDCIIAAITDNHGIALCRVGSPNGGWTTKGDVSYTMELA DIAFC…
TraesCS3B02G591300.1	Wheat	MAEDTETRPASAGAEEREEGEIADDGDGSSAAAAGRISAHPLENAWTFWFDNPQGKSRQVAWGSTIHPIHTFSTVEDFWGLYNNIHNPSKLNVGADFHCFKNKIEPKWEDPICANGGKWTISCGRGKS DTFWLHTLLAMIGEQFDFGDEICGAVVSVRQKQERVAIWTKNAANEAAQISIGKQWKEFLDYRDSIGFIVHEDAKRSDKGPKNRYTV
TraesCS3D02G042600.1	Wheat	MAEGADAEEMGKGEIAGAAAGADGVSAAPQPVEPTWAFWIGNPQEESAGRGNTIHTFSTADEFRSLYKNILQPSKLGVGADLHCFKNKIEPKCEGPIRRNGGAWTISCGEGKSQPLWLDTILALIGGKFE YGNEICGAVLSVCGKQETIAIWIKDATNEAAQLSIGKQWKEFLEYKDSIEFIVHDSDATAVQCWSSTFPDDPLDVIYNKVPSHCSRVRFAAVCRSWCTAASRHPALPELPWLLLSPRDRDTTKRLYCPEDSKILRISLPSDFIGNWFVGCHGGGWVASFEPPPFRILNIFSSVEVALSEKQKGIVCPGRLGQIIIWKIIFSKPPTSSDCIIAAITDNHGIALCRVGCPNGGWTTKGHVSYTMELVDIAFCNGKLYGLTRDRWELVKFE…
TraesCS3D02G527800.1	Wheat	MAEDTETRPASAGAEEREEGEIADDGDGSSAAAAGRITAHPLENAWTFWFDNPQGKSRQVAWGSTIHPIHTFSTVEDFWGLYNNIHNPSKLNVGADFHCFKNKIEPKWEDPICANGGKWTISCGRGKS DTFWLHTLLAMIGEQFDFGDEICGAVVSVRQKQERVAIWTKNAANEAAQISIGKQWKEFLDYKDSIGFIVHEDAKRSDKGPKNRYTV
TraesCS4A02G087900.1	Wheat	MEPAVERKVPEQEEQLQPSHARAEDAPPAAVEEEDEAEAEESERRSRELKAGLHPLRRKLVLWYTRRTPGTRSQSYEDNIKKIVDFSTVESFWVCYCHLARPSSLPSPTDLHLFKEGVRPLWEDPANR NGGKWIIRFKKAVSGRFWEDLVLVLVGDQLDYSDDVCGIVLSCRFNEDILSVWNRNASDQQAVMTLRDSIKRHLKLPHTYLMEYKPHDASLRDNSSYRNTWLRG
TraesCS4B02G216300.1	Wheat	MEPAVERKVPEQEEQLQPSHARAEDAPPAAVEEEDEAEAEESERRNRELKAGLHPLRRKLVLWYTRRTPGTRSQSYEDNIKKIVDFSTVESFWVCYCHLARPSSLPSPTDLHLFKEGVRPLWEDPANR NGGKWIIRFKKAVSGRFWEDLVLVLAGDQLDYSDDVCGIVLSCRFNEDILSVWNRNASDHQAVMTLRDSIKRHLKLPHTYLMEYKPHDASLRDNSSYRNTWLRG
TraesCS4D02G216800.1	Wheat	MEPAVERKVPEQEEQLQPSHARAEDAPPAAVEEEDEAEAEESERRNRELKAGLHPLRRKLVLWYTRRTPGTRSQSYEDNIKKIVDFSTVESFWVCYCHLARPSSLPSPTDLHLFKEGVRPLWEDPANR NGGKWIIRFKKAVSGRFWEDLVLVLVGDQLDYSDDVCGIVLSCRFNEDILSVWNRNASDHQAVMTLRDSIKRHLKLPHTYLMEYKPHDASLRDNSSYRNTWLRG
