# Supplementary material for: Identification and Expression Analysis of the eIF4E1 Gene Family in Maize
Source: Research Square preprint supplement (doi:10.21203/rs.3.rs-7863718/v1), 2025-11-20
Supplement: Supplementary file 4 [file 9ea29d4513d2c2734e92e7ca.xlsx]

## Sheet: Sheet1
The liquid culture medium formula for corn under nitrogen treatment
NH4Suc culture medium（2.5mM）：
Compound	Finalconcern	Stock	mL ofstock/litermedium
KPi（pH6.0）	10mM	1M	10
（NH4)2-Succinate	2.5mM	1M	2.5
CaCl2	1.0mM	1M	1
MgSO4	2.0mM	1M	2.2
MN solution	1×	500×	2
FeNa2EDTA	0.1mM	20mM	5
Sucrose	1%（w/v）		10.0g
500×MN solution
Compound	Final concern	500×Stock	Per liter stock
H3BO3	50μM	25mM	1.55g
ZnCl2	1.0μM	0.5mM	68mg
CuSO4·5H2O	1.0μM	0.5mM	125mg
MnSO4·H2O	12μM	6.0mM	1.01g
Na2MoO4·2H2O	0.2μM	0.1mM	24mg
