# Supplementary material for: Identification and Expression Analysis of the eIF4E1 Gene Family in Maize
Source: Research Square preprint supplement (doi:10.21203/rs.3.rs-7863718/v1), 2025-11-20
Supplement: Supplementary file 5 [file e80e851bb21fae416a33e9ce.xlsx]

## Sheet: Sheet1
TABLE 1 Characterization of the ZmeIF4E1 genes and ZmeIF4E1 proteins.
Name	ID	Gene	Protein	Molecular	Isoelectric	Instability	Aliphatic	GRAVY
		Length (bp)	Length (aa)	weight	point (pI)	index	index
ZmeIF4E1.1.1	Zm00001eb011490_T001	993	229	26541.7	6.32	57.44	74.98	-0.79
ZmeIF4E1.1.2	Zm00001eb046430_T002	976	179	19936.5	5.96	32.28	66.54	-0.488
ZmeIF4E1.1.3	Zm00001eb046430_T001	1087	210	23523.5	5.98	29.98	63.24	-0.537
ZmeIF4E1.3.1	Zm00001eb137550_T001	1243	218	24593.6	5.92	38.31	66.23	-0.585
ZmeIF4E1.3.2	Zm00001eb139930_T001	827	197	21818.4	5.77	46.05	66.04	-0.477
ZmeIF4E1.5	Zm00001eb222060_T001	1242	216	24104.1	5.66	31.13	61.11	-0.53
